# Supplementary material for: Age, Obesity, and Sex Effects on Insulin Sensitivity and Skeletal Muscle Mitochondrial Function
Source: PubMed Central journal article supplement — Diabetes. 2009 Oct 15;59(1):89–97. doi: 10.2337/db09-0591 (PMC2797949; doi:10.2337/db09-0591), 2009-10-15

**Supplemental Table 1. Prescription medication use reported by group**

**Young Lean**

Selective serotonin reuptake inhibitors -2

Oral contraceptive-3

Transdermal contraceptive (ortho evra)-1

**Young Obese**

Selective serotonin reuptake inhibitors -3

Bupropion -1

Proton pump inhibitor-2

Depo-provera-1

Oral contraceptive-1

Antihistamine (Allegra)-2

Leukotriene receptor antagonist (Singulair)-2

**Old Lean**

Thiazide diuretic - 1

Bisphosphonate - 4

Thyroid hormone replacement (levothyroxine) - 1

Angiotensin converting enzyme-inhibitor - 1

Statin-1

**Old Obese**

Thiazide - 2

Statin - 3

Alpha-1 blocker (Doxazosin) - 2

Aromatase inhibitor (Letrozole) - 1

Central nervous system stimulant (Methylphenidate) - 1

Fibrate-1

**Supplemental Figure 1. Mitochondrial ATP Production Rates by Group.**

Baseline mitochondrial ATP production rates expressed per gram of tissue using substrates succinate plus rotenone (SR) (Panel A), pyruvate plus malate (PM) (Panel B), glutamate plus malate (GM) (Panel C), pyruvate plus palmitoyl-L-carnitine plus  $\alpha$ -ketoglutarate plus malate (Panel PPKM) (D),  $\alpha$ -ketoglutarate plus glutamate (KG) (Panel E), and palmitoyl-L-carnitine plus 1 malate (PCM) (Panel F) by study group. Data are presented as means  $\pm$  SEM. \* P-value (Young vs. Elderly within Group); \*\* P-value (Main Effect of Age)

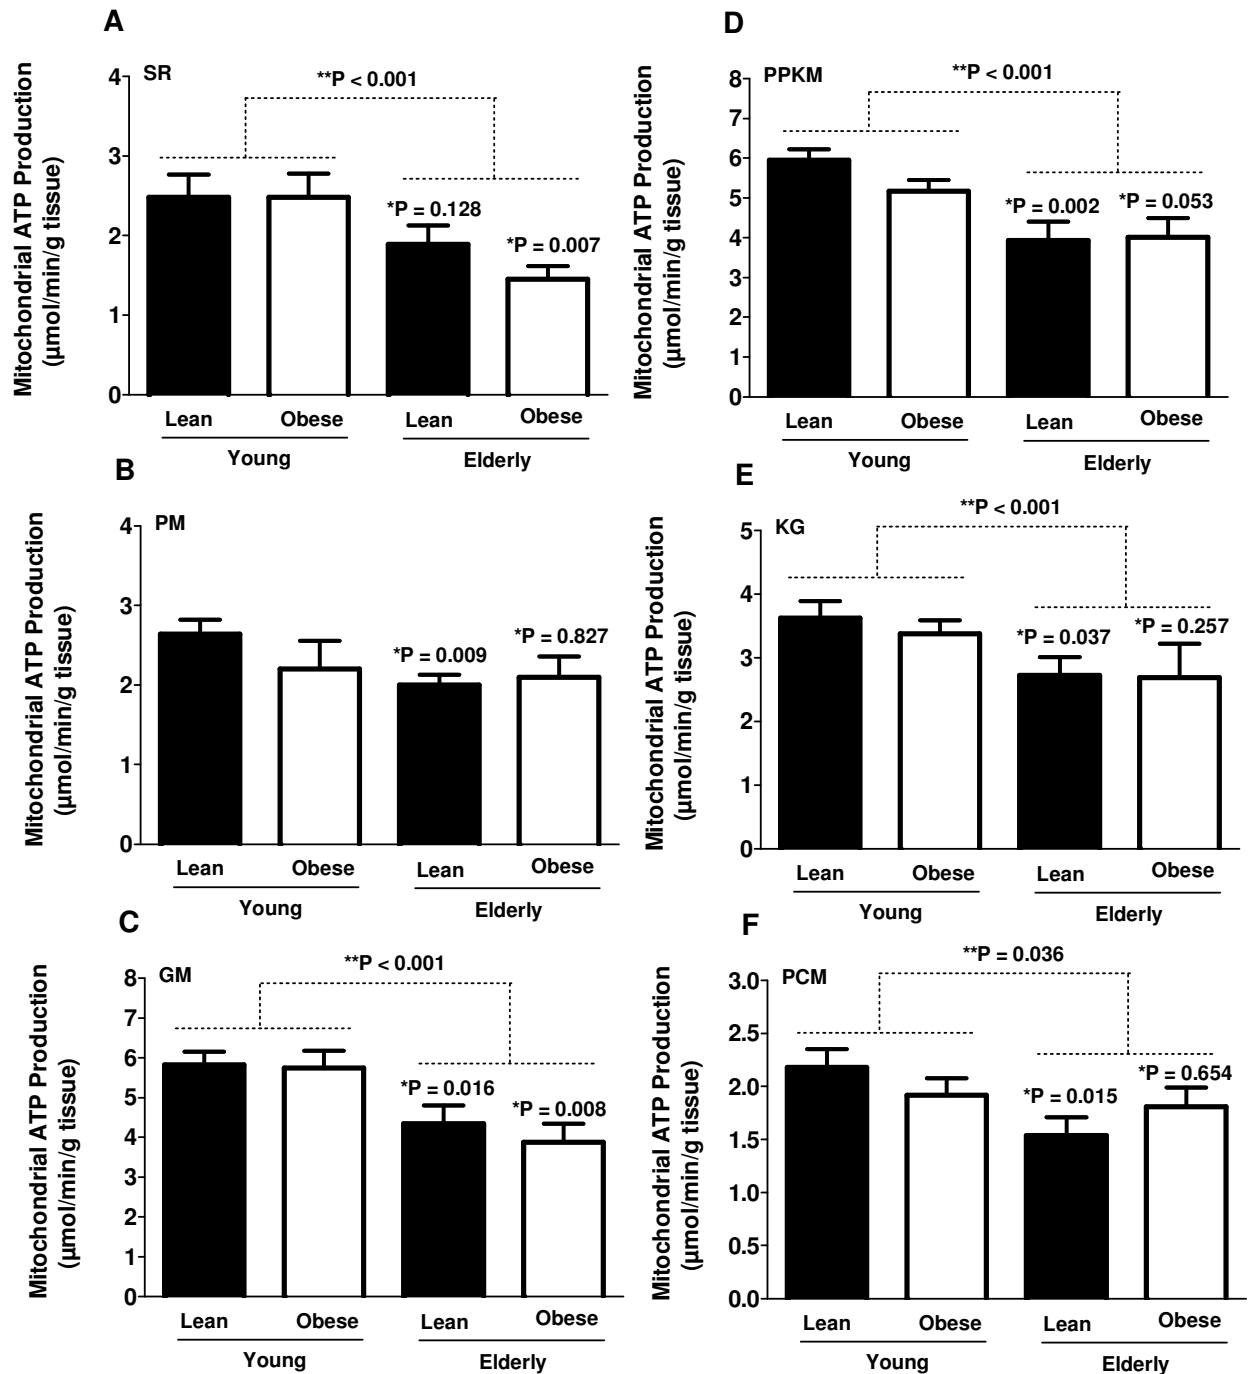

Supplement: supp_db09-0591_db09-0591_Online_appendix.pdf [file supp_db09-0591_db09-0591_Online_appendix.pdf]
